# Supplementary material
Source: PubMed Central journal article supplement (PMC7323864)
Supplement: NIHMS1593269-supplement-Supplementary_Figure_1.pdf [file NIHMS1593269-supplement-Supplementary_Figure_1.pdf]

**522,346 OASIS Home Health Care episodes in 2012**

**335,486 MedPAR inpatient hospitalizations in 2012 for Medicare fee-for-service**

**354,681 observations removed for one or more of following:**

- Under 65 years old (71,104)
- Not Medicare fee-for-service (12,437)
- Assessment reason (OASIS M0100) other than start of care (313,698)
- Duplicate records (36)
- OASIS and HHC claims dates not within 5 days of each other (11,131)

**117,352 inpatient hospitalizations removed for one or more of following:**

- Medical treatment of cancer, primary psychiatric diagnosis, rehabilitation (51,860)
- Death within 30 days of discharge (26,134)
- Not an inpatient short stay hospitalization (75,726)
- Patient left against medical advice (1,605)
- Length of stay 0 days (2922)

**167,665 OASIS observations**

**218,134 inpatient hospitalizations**

**Data merged**

**43,407 hospital-home health episodes**

- OASIS start within 5 days of inpatient discharge
- First hospitalization-HHC episode in 2012
