# Supplementary material
Source: PubMed Central journal article supplement (PMC7323864)
Supplement: NIHMS1593269-supplement-Supplementary_Tables_1-3.pdf [file NIHMS1593269-supplement-Supplementary_Tables_1-3.pdf]

**Supplementary Table 1. Characteristics of Sample by Readmission from Home Health Care**

| <b>Characteristics</b>                                                  | <b>No Readmission</b> | <b>Readmission</b>   | <b>P</b>     |
|-------------------------------------------------------------------------|-----------------------|----------------------|--------------|
|                                                                         | <b>% (N = 37,027)</b> | <b>% (N = 6,380)</b> | <b>Value</b> |
| <b>Age (median, IQR)</b>                                                | 79.0 (72.2, 85.6)     | 80.0 (73.0, 86.1)    | <0.001       |
| <b>Female sex</b>                                                       | 63.8                  | 62.8                 | 0.096        |
| <b>Race/ethnicity</b>                                                   |                       |                      | <0.001       |
| Black                                                                   | 9.0                   | 10.4                 |              |
| White                                                                   | 83.2                  | 80.9                 |              |
| Hispanic                                                                | 5.1                   | 5.9                  |              |
| Other                                                                   | 2.7                   | 2.8                  |              |
| <b>Smoking</b>                                                          | 14.2                  | 16.8                 | <0.001       |
| <b>Drugs or Alcohol Dependency</b>                                      | 2.5                   | 2.6                  | 0.577        |
| <b>Dual Eligibility (Medicare and Medicaid)</b>                         | 17.7                  | 22.5                 | <0.001       |
| <b>Lives alone</b>                                                      | 24.3                  | 22.8                 | 0.009        |
| <b>Index Hospitalization Characteristics</b>                            |                       |                      |              |
| Length of Stay (median, IQR)                                            | 4 (3,6)               | 5 (3,7)              | <0.001       |
| Elixhauser comorbidity index score (median, IQR)                        | 3 (2,5)               | 4 (3,6)              | <0.001       |
| Intensive Care (during index hospitalization)                           | 25.6                  | 31.7                 | <0.001       |
| <b>Diagnoses, Symptoms</b>                                              |                       |                      |              |
| Obesity                                                                 | 17.8                  | 19.1                 | 0.008        |
| Surgical Wound (TKA/THA or other)                                       | 38.4                  | 26.0                 | <0.001       |
| Urinary tract infection (in prior 14 days or on prophylactic treatment) | 14.1                  | 17.3                 | <0.001       |

|                                                                    |      |      |        |
|--------------------------------------------------------------------|------|------|--------|
| Urinary incontinence                                               | 44.3 | 50.0 | <0.001 |
| Urinary catheter in place                                          | 3.3  | 5.7  | <0.001 |
| Bowel Incontinence (any frequency vs. rarely/never)                | 13.1 | 19.0 | <0.001 |
| Shortness of Breath (any severity versus none)                     | 70.1 | 79.6 | <0.001 |
| Pressure Ulcer (at risk of ulcer or presence of<br>≥stage 2 ulcer) | 27.5 | 37.9 | <0.001 |
| Frequency of pain (< daily, daily, or all of the time)             | 68.4 | 65.3 | <0.001 |
| <b>Primary Diagnoses (from index hospitalization)</b>              |      |      |        |
| Acute myocardial infarction                                        | 2.3  | 3.6  | <0.001 |
| COPD                                                               | 4.7  | 6.4  | <0.001 |
| Pneumonia                                                          | 6.2  | 7.5  | <0.001 |
| Heart Failure                                                      | 6.3  | 9.9  | <0.001 |
| Stroke                                                             | 2.1  | 1.9  | 0.315  |
| <b>Primary Procedures (from index hospitalization)</b>             |      |      |        |
| Coronary Artery Bypass Grafting                                    | 1.8  | 1.3  | 0.006  |
| Total Hip or Knee Arthroplasty                                     | 14.6 | 3.0  | <0.001 |
| <b>Rehospitalization Factors (from OASIS)</b>                      |      |      |        |
| Recent decline in status (mental, emotional, or<br>behavioral)     | 11.4 | 14.7 | <0.001 |
| Multiple hospitalizations (≥2) in past year                        | 32.9 | 47.6 | <0.001 |
| History of falls (≥2 or any fall with injury) in past<br>year      | 22.8 | 25.6 | <0.001 |
| Taking ≥5 medications                                              | 86.9 | 89.7 | <0.001 |

|                                                                                                                    |      |      |        |
|--------------------------------------------------------------------------------------------------------------------|------|------|--------|
| Frailty indicators (e.g., weight loss, exhaustion)                                                                 | 30.2 | 39.0 | <0.001 |
| <b>Overall Status of Patient</b> (fragile health with high risk of complications or serious progressive condition) | 31.2 | 45.5 | <0.001 |
| <b>Cognitive/Behavioral/Psychiatric Conditions</b>                                                                 |      |      |        |
| Anxiety (any severity)                                                                                             | 43.2 | 49.5 | <0.001 |
| Depression                                                                                                         | 3.4  | 4.9  | <0.001 |
| Behavioral Issues (e.g., verbal, physical, or disruptive)                                                          | 1.8  | 2.5  | <0.001 |
| Cognitive Function Impairment (any severity)                                                                       | 38.7 | 46.7 | <0.001 |
| Memory deficit or impaired decision-making (any severity)                                                          | 21.0 | 24.9 | <0.001 |
| Psychiatric nursing services – receiving                                                                           | 0.6  | 0.5  | 0.556  |
| <b>Sensory/Expressive</b>                                                                                          |      |      |        |
| Hearing - any impairment                                                                                           | 36.6 | 41.6 | <0.001 |
| Visual – any impairment                                                                                            | 19.9 | 24.0 | <0.001 |
| Verbal Understanding – any impairment                                                                              | 34.9 | 42.0 | <0.001 |
| Verbal Expression – any difficulty                                                                                 | 33.2 | 40.8 | <0.001 |
| <b>Home Health Factors</b>                                                                                         |      |      |        |
| Nurse completed HHC start of care                                                                                  | 90.9 | 94.7 | <0.001 |
| Therapies – infusion, total parental nutrition, or tube feeds                                                      | 4.1  | 6.5  | <0.001 |
| Respiratory therapies – oxygen, ventilator, or positive airway pressure                                            | 18.4 | 25.9 | <0.001 |

**Prior Activities of Daily Living** (any assistance)

|                                                   |      |      |        |
|---------------------------------------------------|------|------|--------|
| Ambulation – any assistance                       | 43.3 | 52.3 | <0.001 |
| Household (e.g., meal prep, laundry, shopping)    | 68.6 | 78.4 | <0.001 |
| Self-care (e.g., grooming, dressing, and bathing) | 47.0 | 56.9 | <0.001 |
| Transfers                                         | 38.4 | 47.5 | <0.001 |

**Current Activities of Daily Living** (assistance from another person)

|                                                                                                                 |      |      |        |
|-----------------------------------------------------------------------------------------------------------------|------|------|--------|
| Ambulation (able to walk only with supervision/assistance of another person, or unable to ambulate, or bedfast) | 42.8 | 47.7 | <0.001 |
| Bathing                                                                                                         | 89.2 | 90.6 | 0.001  |
| Dressing lower body                                                                                             | 87.6 | 88.9 | 0.003  |
| Dressing upper body                                                                                             | 82.2 | 85.6 | <0.001 |
| Feeding                                                                                                         | 51.7 | 58.4 | <0.001 |
| Grooming                                                                                                        | 75.7 | 79.9 | <0.001 |
| Toilet transferring                                                                                             | 62.6 | 67.2 | <0.001 |
| Toileting hygiene                                                                                               | 68.0 | 73.0 | <0.001 |
| Transferring                                                                                                    | 86.7 | 88.3 | <0.001 |
| <b>Oral Medication Management</b> (needing assistance)                                                          | 67.9 | 77.7 | <0.001 |

---

**Supplementary Table 2. Odds Ratios for Variables in Full Predictive Model**

| <b>Characteristics</b>                          | <b>Odds Ratio</b> | <b>95% Confidence Interval</b> |
|-------------------------------------------------|-------------------|--------------------------------|
| <b>Age Category</b>                             |                   |                                |
| 65-69.9                                         | ref               | --                             |
| 69.9-74.7                                       | 0.92              | 0.84, 1.02                     |
| 74.7-79.2                                       | 0.93              | 0.84, 1.02                     |
| 79.2-83.5                                       | 0.91              | 0.82, 1.00                     |
| 83.5-88.0                                       | 0.91              | 0.82, 1.01                     |
| 88.0-112.3                                      | 0.88              | 0.79, 0.98                     |
| <b>Female sex</b>                               | 0.97              | 0.91, 1.03                     |
| <b>Race/ethnicity</b>                           |                   |                                |
| Black                                           | ref               | --                             |
| White                                           | 1.02              | 0.92, 1.12                     |
| Hispanic                                        | 1.04              | 0.90, 1.20                     |
| Other                                           | 0.97              | 0.80, 1.16                     |
| <b>Smoking</b>                                  | 1.04              | 0.96, 1.12                     |
| <b>Dual Eligibility (Medicare and Medicaid)</b> | 1.10              | 1.02, 1.18                     |
| <b>Lives alone</b>                              | 0.94              | 0.88, 1.01                     |
| <b>Index Hospitalization Characteristics</b>    |                   |                                |
| Length of Stay                                  |                   |                                |
| 1                                               | ref               | --                             |

|                                               |      |            |
|-----------------------------------------------|------|------------|
| 2                                             | 0.83 | 0.72, 0.96 |
| 3                                             | 0.89 | 0.78, 1.02 |
| 4                                             | 1.00 | 0.87, 1.15 |
| 5                                             | 1.06 | 0.92, 1.22 |
| 6                                             | 1.13 | 0.97, 1.31 |
| 7                                             | 1.17 | 1.00, 1.37 |
| ≥8                                            | 1.36 | 1.19, 1.55 |
| Elixhauser comorbidity index                  |      |            |
| 0                                             | ref  | --         |
| 1                                             | 1.03 | 0.81, 1.31 |
| 2                                             | 1.17 | 0.93, 1.47 |
| 3                                             | 1.32 | 1.06, 1.66 |
| 4                                             | 1.47 | 1.17, 1.85 |
| 5                                             | 1.57 | 1.25, 1.98 |
| 6                                             | 1.78 | 1.41, 2.25 |
| 7                                             | 2.03 | 1.60, 2.58 |
| 8                                             | 1.84 | 1.42, 2.39 |
| 9                                             | 2.11 | 1.59, 2.81 |
| ≥10                                           | 2.12 | 1.51, 2.99 |
| Intensive Care (during index hospitalization) | 1.01 | 0.95, 1.07 |
| <b>Diagnoses, Symptoms</b>                    |      |            |
| Surgical Wound                                |      |            |
| THA/TKA                                       | 0.35 | 0.30, 0.41 |

|                                                                                                                    |      |            |
|--------------------------------------------------------------------------------------------------------------------|------|------------|
| Other                                                                                                              | 0.90 | 0.83, 0.96 |
| Urinary tract infection (in prior 14 days or on prophylactic treatment)                                            | 1.02 | 0.94, 1.10 |
| Urinary incontinence                                                                                               | 1.02 | 0.96, 1.09 |
| Urinary catheter in place                                                                                          | 1.40 | 1.23, 1.60 |
| Bowel Incontinence (any frequency vs. rarely/never)                                                                | 1.11 | 1.02, 1.20 |
| Shortness of Breath (any severity versus none)                                                                     | 1.10 | 1.03, 1.19 |
| Pressure Ulcer (risk of ulcer or presence of $\geq$ stage 2 ulcer)                                                 | 1.17 | 1.10, 1.25 |
| Frequency of pain (< daily, daily, or all of the time)                                                             | 1.00 | 0.94, 1.07 |
| <b>Primary Diagnoses</b> (from index hospitalization)                                                              |      |            |
| Acute myocardial infarction                                                                                        | 1.38 | 1.18, 1.61 |
| Pneumonia                                                                                                          | 0.89 | 0.80, 0.99 |
| Stroke                                                                                                             | 0.96 | 0.79, 1.17 |
| <b>Primary Procedures</b> (from index hospitalization)                                                             |      |            |
| Coronary Artery Bypass Grafting                                                                                    | 0.63 | 0.49, 0.80 |
| <b>Rehospitalization Factors</b> (from OASIS)                                                                      |      |            |
| Recent decline in status (mental, emotional, or behavioral)                                                        | 1.01 | 0.92, 1.10 |
| Multiple hospitalizations ( $\geq 2$ ) in past year                                                                | 1.32 | 1.25, 1.40 |
| History of falls ( $\geq 2$ or any fall with injury) in past year                                                  | 0.97 | 0.90, 1.03 |
| Taking $\geq 5$ medications                                                                                        | 1.01 | 0.92, 1.11 |
| Frailty indicators (e.g., weight loss, exhaustion)                                                                 | 1.07 | 1.01, 1.14 |
| <b>Overall Status of Patient</b> (fragile health with high risk of complications or serious progressive condition) | 1.21 | 1.14, 1.28 |

**Cognitive/Behavioral/Psychiatric Conditions**

|                                                              |      |            |
|--------------------------------------------------------------|------|------------|
| Anxiety (any severity)                                       | 1.01 | 0.95, 1.07 |
| Behavioral Issues (e.g., verbal, physical, or disruptive)    | 1.12 | 0.93, 1.35 |
| Cognitive Function Impairment (any severity)                 | 1.00 | 0.92, 1.09 |
| Memory deficit or impaired decision-making<br>(any severity) | 0.89 | 0.82, 0.96 |
| Psychiatric nursing services – receiving                     | 0.77 | 0.53, 1.11 |

**Sensory/Expressive**

|                                       |      |            |
|---------------------------------------|------|------------|
| Hearing - any impairment              | 1.01 | 0.94, 1.07 |
| Visual – any impairment               | 0.97 | 0.90, 1.04 |
| Verbal Understanding – any impairment | 0.97 | 0.89, 1.06 |
| Verbal Expression – any difficulty    | 1.03 | 0.94, 1.12 |

**Home Health Factors**

|                                                                            |      |            |
|----------------------------------------------------------------------------|------|------------|
| Nurse completed HHC start of care                                          | 1.11 | 0.98, 1.26 |
| Therapies – infusion, total parental nutrition, or tube feeds              | 1.23 | 1.10, 1.39 |
| Respiratory therapies – oxygen, ventilator, or positive<br>airway pressure | 1.05 | 0.98, 1.12 |

**Prior Activities of Daily Living (any assistance)**

|                                                   |      |            |
|---------------------------------------------------|------|------------|
| Ambulation – any assistance                       | 0.95 | 0.84, 1.06 |
| Household (e.g., meal prep, laundry, shopping)    | 1.08 | 0.99, 1.17 |
| Self-care (e.g., grooming, dressing, and bathing) | 0.98 | 0.90, 1.08 |
| Transfers                                         | 1.09 | 0.97, 1.22 |

**Current Activities of Daily Living (assistance from another**



|                                                                                                                 |      |            |
|-----------------------------------------------------------------------------------------------------------------|------|------------|
| person)                                                                                                         |      |            |
| Ambulation (able to walk only with supervision/assistance of another person, or unable to ambulate, or bedfast) | 1.03 | 0.97, 1.10 |
| Bathing                                                                                                         | 1.03 | 0.92, 1.15 |
| Dressing lower body                                                                                             | 0.93 | 0.80, 1.10 |
| Dressing upper body                                                                                             | 1.05 | 0.89, 1.22 |
| Feeding                                                                                                         | 1.02 | 0.96, 1.09 |
| Grooming                                                                                                        | 1.00 | 0.90, 1.11 |
| Toilet transferring                                                                                             | 0.97 | 0.89, 1.06 |
| Toileting hygiene                                                                                               | 0.99 | 0.90, 1.08 |
| Transferring                                                                                                    | 1.03 | 0.93, 1.14 |
| <b>Oral Medication Management</b> (needing assistance)                                                          | 1.16 | 1.08, 1.25 |

---

**Supplementary Table 3. Top Ten Variables in Gradient Boosting Machine Predictive Model**

| <b>Variable</b>                                                                                                       | <b>Relative Influence*</b> |
|-----------------------------------------------------------------------------------------------------------------------|----------------------------|
| <b>Elixhauser Comorbidity Index Score</b>                                                                             | 25.4                       |
| <b>Length of Stay</b>                                                                                                 | 15.1                       |
| <b>Surgical Wound - TKA/THA or other</b>                                                                              | 13.7                       |
| <b>Multiple hospitalizations (<math>\geq 2</math>) in past year</b>                                                   | 8.6                        |
| <b>Overall Status of Patient</b> (fragile health with high risk of complications<br>or serious progressive condition) | 7.0                        |
| <b>Age Category</b>                                                                                                   | 3.7                        |
| <b>Pressure Ulcer (risk of ulcer or presence of &gt;stage 2 ulcer)</b>                                                | 3.3                        |
| <b>Urinary catheter in place</b>                                                                                      | 2.3                        |
| <b>Therapies – infusion, total parental nutrition, or tube feeds</b>                                                  | 1.5                        |
| <b>Oral Medication Management</b>                                                                                     | 1.4                        |

\*Relative influence is an assessment of aggregate contribution to overall model fit and is summed from contributions to trees in the model
